1 **Supervised and self-directed technology-based dual-task exercise training**  
2 **programme for older adults at risk of falling – Protocol for a feasibility**  
3 **study**

4 Perna Mathur<sup>1</sup>, Helen Thomas<sup>2</sup>, Angela Cooper<sup>1</sup>, Magdalena Chechlacz<sup>3,4</sup>, Afroditi Stathi<sup>1</sup>,  
5 Victoria Goodyear<sup>1</sup>, Caroline Miller<sup>5</sup>, Taylor Krauss<sup>2</sup>, Natalie Ives<sup>6</sup>, Laura Magill<sup>7</sup>, Philip  
6 Kinghorn<sup>8</sup>, Daisy Wilson<sup>9</sup>, Shin-Yi Chiou<sup>1\*</sup>.

7 <sup>1</sup>School of Sport, Exercise and Rehabilitation Sciences, University of Birmingham,  
8 Birmingham, UK

9 <sup>2</sup>Solihull Specialist Falls Team

10 <sup>3</sup>School of Psychology, University of Birmingham, UK

11 <sup>4</sup>Centre for Human Brain Health, University of Birmingham, UK

12 <sup>5</sup>Integrated Clinical Academic Office, University Hospitals Birmingham, NHS Foundation  
13 Trust, UK

14 <sup>6</sup>Birmingham Clinical Trials Unit, University of Birmingham, UK

15 <sup>7</sup>Birmingham Centre for Observational and Prospective Studies (BiCOPS), School of Health  
16 Sciences, University of Birmingham

17 <sup>8</sup>Institute of Health Economics Unit, Department of Applied Health Research, University of  
18 Birmingham, UK

19 <sup>9</sup>Institute of Inflammation and Ageing Clinical Lecturer, University of Birmingham, UK.

20

21 Short-title: Technology-based dual-task training in older adults.

22 **\*Corresponding author:**

23 Email: [s.chiou@bham.ac.uk](mailto:s.chiou@bham.ac.uk) (SYC)

24

25 **Funding**

26 This work was supported by the National Institute for Health and Care Research (NIHR)

27 **NOTE:** This preprint reports new research that has not been certified by peer review and should not be used to guide clinical practice.  
Research for Patient Benefit (grant number: NIHR205389).

## 28 Sponsor

29 The University of Birmingham will host the study and hold negligent harm and non-negligent  
30 harm insurance policies.

31

## 32 Abstract

33 Falls among older adults pose a significant public health challenge, as they lead to  
34 severe outcomes such as fractures and loss of independence. Research has shown that training  
35 cognitive function and balance simultaneously, termed Dual-Task (DT) training, improves  
36 mobility and reduces fall risks in older adults. This study aims to evaluate the feasibility and  
37 acceptability of a blended supervised and self-directed technology-based DT training  
38 programme for older adults who have high risk of falling. This is a single-arm, non-  
39 randomised feasibility study employing quantitative and qualitative methods. Fifty healthy  
40 adults aged 65 years or above will be recruited from the NHS primary and secondary care  
41 pathways and from the community. Participants will undergo supervised cognitive and  
42 balance DT training for 12 weeks, followed by self-directed DT training for an additional 12  
43 weeks. The cognitive training will be delivered using a commercial mobile application (app)  
44 available from the AppStore or Google Play. The balance training will involve static  
45 (Marching on the spot, Tandem Stand, Hip Abduction & Extension, Squats, Tiptoe Stand,  
46 and Pendulum/Sideways Sway) and dynamic (Figure of Eight Walk, Walking Forwards and  
47 Backwards, Lunges, Functional Reach, Toe Tapping, Upper Limb Strength Exercises, and  
48 Side-Steps/Simple Grapevine) exercises focused on improving balance, postural stability and  
49 strength. Feasibility outcomes will be recruitment, adherence, usage of the app, and attrition.  
50 Outcomes measure data, that will be collected at baseline and at 24 weeks, includes the  
51 Timed- Up and Go (TUG) test (likely primary outcome in any future trial), along with self-  
52 reported questionnaires assessing cognition, fear of falling, quality of life, healthcare service

53 usage, and the self-reported number of falls. Focus group interviews will be conducted with  
54 thirty participants and thirty healthcare professionals for in-depth exploration of the  
55 feasibility and acceptability of the DT training programme.

56 **Trial registration number:** ISRCTN15123197

57

## 58 **Introduction**

59 Falls among older adults represent a significant public health issue. Around 1 in 3  
60 adults aged over 65, and half of adults aged over 80, have at least one fall a year, and in half  
61 of such cases the falls are recurrent (1, 2). Falls can lead to severe consequences such as hip  
62 fractures, which often result in reduced mobility and loss of independence (3). An estimated  
63 £4.4 billion is spent annually on treating fractures and fall-related injuries (4). The prevalence  
64 of falls and associated complications necessitates the development and implementation of  
65 effective intervention strategies aimed at prevention.

66 Evidence suggests that age-related declines in cognition and mobility are risk factors  
67 for falls in older adults(5-7). Studies reveal that older adults with better mobility perform  
68 better in assessments of global cognition, executive function, memory and processing speed  
69 (7-11), suggesting the interplay between cognition and mobility. Research has shown that the  
70 decreasing ability to multitask is associated with increasing risk of falling in older adults (12,  
71 13) and that training cognitive and physical function simultaneously, termed Dual-Task (DT)  
72 training, is superior to single-task (i.e., only physical function) training or no training for  
73 improving walking speed in older adults (1, 14).

74 The cognitive element of DT training can be delivered via technology (e.g., mobile  
75 apps), enabling professionals to select cognitive exercises that are suitable to be combined  
76 with physical exercises, allowing for the DT training to be self-directed and performed

77 outside of clinical environments. Mobile apps are interactive, provide instant feedback, and  
78 can send reminders to users. These features promote engagement and adherence to  
79 exercise(15). Previous studies reported improved balance and walking speed after self-  
80 directed, home-based DT training programmes with mobile apps in older adults, with  
81 excellent adherence rate (85-90%) (16, 17). These findings support the notion that  
82 technology-based exercise (not limited to DT exercise) may be a sustainable means of  
83 promoting physical activity and preventing falls in older adults(18-20).

84 Whilst a purely technology and home-based exercise programme seems attractive, it  
85 may appear daunting to some older adults, such as those who are reported to have lower  
86 levels of knowledge and competence in using mobile apps(21, 22). Barriers to the use of  
87 technology in the medical context amongst older adults have been reported(23). A blended  
88 approach, combining supervised sessions with self-directed sessions, can help mitigate the  
89 challenges older adults might face while using the mobile app by providing initial hands-on  
90 guidance and ongoing support. The gradual transition from supervised to self-directed  
91 exercises allows participants to build confidence and familiarity with the technology,  
92 ultimately improving their engagement and adherence(24).

93 While it is evident that a DT programme can be administered well under  
94 supervision(14, 25), we have limited knowledge on how to best assure its quality, outcomes,  
95 and compliance when administered unsupervised with the support of technology, such as a  
96 mobile app. Therefore, the primary aims of this study are to evaluate; (1) the acceptability of  
97 a technology-based DT programme with blended supervised and self-directed approaches in  
98 older adults at higher risk of falling and (2) to determine the feasibility of the programme to  
99 be adopted by the National Healthcare System as a treatment for falls prevention and  
100 management in older adults in the United Kingdom.

101

## 102 **Objectives**

- 103 1. To evaluate whether a blended supervised and self-directed DT training programme  
104 delivered via a mobile app is acceptable to older adults living in the community who  
105 have had recurrent falls in the past 12 months.
- 106 2. To assess the feasibility of the technology-based blended DT training to be  
107 implemented in the NHS for falls prevention and management in older adults.

108 The information collected will inform the design of a larger scale Randomised Controlled  
109 Trial to evaluate the clinical and cost-effectiveness of the blended intervention in older adults  
110 aged 65 years and above at risk of falls.

111

## 112 **Methods and analysis**

### 113 **Study Design**

114 This is a single-arm, non-randomised feasibility study of a technology-based, blended  
115 DT training programme in older adults with a history of falls (Fig 1) outlines the schedule of  
116 enrolment, interventions and assessment and provides insight into the trial process and data  
117 collection. The flow of the study is shown in Fig 2. This study was approved by the East of  
118 England - Cambridge East Research Ethics Committee (REC reference: 24/EE/0059) and  
119 registered on the International Standard Randomised Controlled Trials Number Registry  
120 (ISRCTN15123197) on April 16, 2024. The study protocol is reported following the SPIRIT  
121 check list (S1 Appendix).

122

## 123 **Setting**

124           The study will be conducted in a community setting in Birmingham, UK. There are  
125 two phases: phase 1 is supervised cognitive and balance DT training for 12 weeks at local  
126 community centres, followed by a phase 2 which is self-directed DT training for an additional  
127 12 weeks.

128

## 129 **Participants and recruitment**

130           Participants will be recruited from primary and secondary care pathways in the  
131 National Health Services (NHS) in England and from the community in the West Midlands.  
132 The study will be promoted via a number of methods including general practitioners sending  
133 text messages to patients, healthcare professionals identifying eligible patients in the falls  
134 clinics, and study flyers displayed in relevant organisations, such as retirement villages,  
135 charity organisations, and interest groups. Interested individuals from the NHS and from the  
136 community will be directed to an online participant information sheet (PIS) or given a copy  
137 of the PIS by their healthcare professional and by the research team, respectively. They can  
138 contact the research team to request further information of regarding participation and/or to  
139 ask any study-related questions they may have. If they are interested and willing into be  
140 enrolled in the study, the research team will confirm the eligibility of the potential participant  
141 via telephone or a face-to-face appointment, explain the study and what is involved, should  
142 they agree to take part, answer any questions they have. Written informed consent (S2  
143 Appendix) will be obtained from all participants at community venues where the baseline  
144 assessment and supervised intervention will be held. Recruitment was started on 29/04/2024  
145 and is ongoing.

146

## 147 **Eligibility Criteria**

148 The inclusion criteria are:

- 149 1) aged 65 years and above
- 150 2) able to give informed written consent
- 151 3) having sufficient cognition/hearing/vision to follow instructions of the assessment and  
152 the exercise programme
- 153 4) able to stand with one hand support on the current walking aid for at least 60 seconds
- 154 5) able to stand up from a chair independently and walk for 6 meters independently with  
155 the current walking aid
- 156 6) able to use toilet independently
- 157 7) having access to a smartphone or tablet compatible to the Peak-brain training app(26,  
158 27) on iOS or Android devices
- 159 8) had two or more falls in the last 12 months.

160

161 The exclusion criteria are:

- 162 1) having an unstable or acute medical condition (such as fractures, acute coronary  
163 syndromes) that preclude exercise participation
- 164 2) suffer from a progressive neurological condition (such as Parkinson's disease or  
165 multiple sclerosis)
- 166 3) not recommended to undertake any forms of exercise by their doctors
- 167 4) currently participating in a different research study for managing their fall risks.

168

## 169 **Sample size**

170 The sample size (n=50) was chosen based on published literature where a sample size  
171 of between 50 and 100 participants (total; i.e. 25 to 50 per group) is recommended for pilot  
172 studies(28-30). If we identify 100 eligible participants, we will be able to estimate a  
173 participation rate of 50% within a 95% confidence interval of +/-9.8%. With a sample size of  
174 50 participants, we will be able to estimate an attrition rate of 20% within a 95% confidence  
175 interval of +/-11%.

176

## 177 **Intervention**

178 All participants will receive the DT training programme for 24 weeks. The  
179 programme has two phases (Table 1). Phase 1 is 12 weeks long. It consists of supervised  
180 group exercises once a week, along with two other home-based sessions of self-directed,  
181 independent exercise similar to the class exercises. The group exercise class of 5-10  
182 participants will be led by a physiotherapist 1 day/week. The classes will be approximately  
183 50 minutes in duration and include 40 minutes of DT training with 10 minutes of warm-up  
184 and cool-down. The exercise classes will be held in local community centres that will be easy  
185 access for the participants.

186

187 **Table 1. A summary of dual-task training programme.**

| <b>Supervised group exercise</b>                 | <b>Self-directed, home-based exercise</b> |
|--------------------------------------------------|-------------------------------------------|
| <b>Duration:</b> 50 minutes                      | <b>Duration:</b> 50 minutes               |
| <b>Location:</b> local leisure/wellbeing centres | <b>Location:</b> at home                  |



|                                                                                                                                                                                                                                                                                                                                                        |                                                                                                                                                                                                                                                                                                                                                                       |
|--------------------------------------------------------------------------------------------------------------------------------------------------------------------------------------------------------------------------------------------------------------------------------------------------------------------------------------------------------|-----------------------------------------------------------------------------------------------------------------------------------------------------------------------------------------------------------------------------------------------------------------------------------------------------------------------------------------------------------------------|
| <p><b>Frequency:</b> one class/week (Weeks 1-12)</p> <p><b>Content:</b> 5 minutes warm-up, 40 minutes of DT training, 5 minutes cool down.</p> <p><b>DT training:</b></p> <ul style="list-style-type: none"> <li>• Cognitive exercises delivered via the Peak app.</li> <li>• Strength and balance exercises delivered by a physiotherapist</li> </ul> | <p><b>Frequency:</b> twice/week (Weeks 1-12); thrice/week (Weeks 12-24)</p> <p><b>Content:</b> 5 minutes warm-up, 40 minutes of DT training, 5 minutes cool down.</p> <p><b>DT training:</b></p> <ul style="list-style-type: none"> <li>• Cognitive exercises delivered via the Peak app.</li> <li>• Strength and balance exercises in an exercise booklet</li> </ul> |
|--------------------------------------------------------------------------------------------------------------------------------------------------------------------------------------------------------------------------------------------------------------------------------------------------------------------------------------------------------|-----------------------------------------------------------------------------------------------------------------------------------------------------------------------------------------------------------------------------------------------------------------------------------------------------------------------------------------------------------------------|

188

189

190 Phase 2 is self-directed, with participants independently exercising at home using the  
 191 app, 50 minutes per day, 3 days per week, for 12 weeks. Participants will have access to the  
 192 Peak app(26) and will repeat the same exercises that they have performed in the phase 1 but  
 193 without supervision. This phase reinforces the idea of performing DT training as part of one’s  
 194 routine for maintaining balance and mobility, thereby reducing the risk of recurrent falls.

195

196 **DT training programme**

197 The DT training programme requires participants to perform both cognitive tasks and  
 198 balance and strength exercises simultaneously. The cognitive exercises are delivered via the  
 199 Peak app(26) which is a commercial app that can be downloaded from the App Store (iOS) or  
 200 Google Play (Android). The research team will assist participants to install the app on their  
 201 own devices prior to the start of the first class. The PEAK app(26) has multiple games, and  
 202 the choices of the games are based on two criteria: 1) whether a game can be safely  
 203 performed with a balance exercise, and 2) the type of cognitive function being trained. For

204 the second criterion, we prioritise the games that require executive function, memory,  
205 attention, and processing speed as they have been shown to relate to balance control and  
206 falls(31-34). Eighteen games covering the above cognitive domains were chosen within 4  
207 categories of games available from the Peak app, Focus, Memory, Mental Agility, and  
208 Problem Solving (Must Sort, Rush Back, unique, Decoder; Perilous Path, Memory Sweep,  
209 Spin Cycle, Apprentice Wizard, Partial Match; True Color, Face Switch, Refocus, Turtle  
210 Traffic; Puzzle Box, Slider, Low Pop, Castle Block, Earth Defence).

211

212 For the physical exercise, the standardised static and dynamic balance and strength  
213 exercises routinely prescribed to older adults for falls management and prevention are  
214 included in the programme. The static exercises (Marching on the spot, Tandem Stand, Hip  
215 Abduction & Extension, Squats, Tiptoe Stand, and Pendulum/Sideways Sway; S3 Appendix)  
216 will be performed concurrently with the cognitive exercises (S4 Appendix). The dynamic  
217 exercises (Figure of Eight Walk, Walking Forwards and Backwards, Lunges, Functional  
218 Reach, Toe Tapping, Upper Limb Strength Exercises using a resistance band, and Side-  
219 Steps/Simple Grapevine) will be performed independently (i.e. not concurrently with the  
220 cognitive exercises) (S3 Appendix). These exercises were selected by a specialist  
221 physiotherapist from the University Hospitals Birmingham, considering the safety of  
222 participants in light of the dual task nature of the training programme.

223

## 224 **Supervised group exercise classes**

225 In the Phase 1 of the training programme, participants will be asked to attend an  
226 exercise class (of 5-10 participants) once a week for 12 weeks. In each class participants will  
227 be shown three static and three dynamic exercises respectively by a physiotherapist. The class  
228 will consist of a 5-minute warm-up at the start, after which participants will perform the three

229 static exercises, followed by the three dynamic exercises, and finish with a 5-minute cool-  
230 down to complete the class. Each exercise will last for approximately 6 minutes, with short  
231 breaks between each exercise. The three static exercises will be performed with three  
232 different games from the Peak app for cognitive brain training.

233 The participant's device will be placed on a height-adjustable music stand in front of  
234 the participant at an appropriate distance that allows them to use the app comfortably. There  
235 will be a chair placed next to the participant for support during the exercises if needed. The  
236 physiotherapist leading the class will provide individual support and adjustment to the  
237 exercises to each participant to ensure that everyone is able to engage with the DT exercise  
238 training as per their capacity. The Peak app adapts the games (increase/decrease of the  
239 difficulty level) based on the participant's performance to maintain cognitive challenges as  
240 they progress. At the end of the class, participants can note down the exercises and variations  
241 performed in the class in an exercise diary.

242

### 243 **Self-directed, home-based exercise**

244 Participants will be instructed to perform the same DT exercises at home on another  
245 two days in the same week after each class in phase 1, and three times a week during phase 2,  
246 the self-directed, home-based DT part of the programme. The scope of the blended approach  
247 is to allow participants time to learn the exercises and the technology, to develop an exercise  
248 routine, to improve their ability(35, 36), and potentially enhance their confidence to use the  
249 app. All participants will be given a handbook which has images and instructions of all the  
250 physical and cognitive exercises (S3 & S4 Appendices) to help them exercise at home. They  
251 will also have access to online videos demonstrating how to perform each exercise correctly  
252 and safely. Equipment required (height-adjustable music stand, and resistance bands) for  
253 exercising at home will be provided to the participants. Participants will be asked to record

254 their adherence to the programme. In phase 1, participants will document, in an exercise diary  
255 provided to them at the start of the training programme, the cognitive games performed with  
256 the physical exercises. In phase 2, participants will be asked to document both the cognitive  
257 games and the physical exercises performed in the exercise diary. Participants will be able to  
258 contact the research team (via email or SMS) for technology assistance and/or to ask  
259 questions during the self-directed home-based exercise.

260

## 261 **Educational session**

262 An in-person educational session for falls awareness will be presented to the  
263 participants at the end of phase 1. This session will be conducted by the physiotherapist  
264 delivering the training programme. In the education session, participants will be reminded of  
265 the content of phase 2, access to the resources (i.e., the handbook and videos), and support  
266 they can receive if they run into any technical difficulties with the app.

267 Participants will also be asked to consider ways that may help them stay motivated in  
268 doing the exercise in the next 12 weeks, such as creating WhatsApp groups or using  
269 Facebook Messenger, and supplemented by face-to-face “coffee shop” get-togethers to stay  
270 in touch with other participants in the same age and/or living in the same area.

271

## 272 **Measures**

### 273 **Feasibility Outcome Measures**

274 The feasibility outcomes of the study are whether the study is appealing to participants  
275 (assessed by the recruitment and retention rate) and if the intervention is acceptable  
276 (measured by adherence and usage of the app).

- 277 1. *Recruitment*. Recruitment will be calculated as (number recruited/number approached) x  
278 100. The source of recruitment (e.g., primary care, secondary care, and community) will  
279 be documented to evaluate which recruitment route is the most appropriate for the main  
280 trial.
- 281 2. *Adherence*. Adherence will be calculated as: (self-reported number of exercise  
282 days/number of prescribed days) x 100 using the information recorded on the exercise  
283 diary.
- 284 3. *Usage of the app*. This will be analysed based on the self-reported number of games  
285 performed and the repetition of each game during the DT programme.
- 286 4. *Study attrition*. Attrition will be calculated as: [(number of dropouts)/ number recruited) x  
287 100].
- 288 5. A self-reported online EXIT survey (S5 Appendix) will be completed by participants to  
289 provide feedback on the usability, perceived effectiveness and satisfaction from the  
290 training programme based on the feasibility assessment framework(37).

291

## 292 **Stop-Go criteria**

293 A 'traffic light' system based on recruitment, adherence, app usage and retention will be  
294 used to provide guidance as to whether the project should progress to a full trial with an  
295 internal pilot (green), progress to full trial with internal pilot with adaption (amber), or no  
296 progression (red).

- 297 • **Green:** recruitment  $\geq 50\%$ ; adherence and usage of the app over the programme is  $\geq 80\%$   
298 of the time (i.e., completed the physical exercises and cognitive exercises in 58 sessions  
299 or more out of a total of 72 sessions over 24 weeks); and retention is  $\geq 80\%$ . Focus group

300 results support the feasibility and acceptability of the study and the blended intervention,  
301 and there are no safety concerns.

- 302 • **Amber:** recruitment 30-49%; adherence and usage of the app is 50-79%; and retention  
303 rate is 50-79% of the time. Focus group results indicate that changes in the design and  
304 delivery of the programme are required, and there are no safety concerns. Potential  
305 changes could be technical support required for the phase 2 where participants undertake  
306 the exercise independently.
- 307 • **Red:** recruitment <30%; adherence and usage of the app is <50%; and retention is <50%  
308 of the time. Focus group results do not support the study progressing to a larger-scale  
309 RCT, and/or there are safety concerns, which cannot be addressed.

310 Data from the feasibility study will directly feed into the above stop-go to provide  
311 guidance on progression to the full trial. Any decision will also be informed by the findings  
312 of the focus groups (see below qualitative methods for details).

313

## 314 **Exploratory Outcomes**

315 The study has three assessment periods – baseline ( $t_0$ ), Week 12 ( $t_1$ ), Week 24 ( $t_2$ )  
316 where data collection is undertaken (Fig 2). Information on participant demographics (age,  
317 sex, ethnicity, post code and level of education) will be collected in order to describe the  
318 study participants and assess inclusion and reach of the study.

319 Data will be collected on the following outcomes which are planned outcome  
320 measures in any future trial in order to assess data collection procedures, data completeness  
321 and to help inform sample size calculation for the future trial.

- 322 1. *Mobility and dynamic balance.* Timed Up and Go (TUG)(38) with and without  
323 concurrent undertaking of a cognitive task will be carried out in the presence of the

324 physiotherapist to evaluate mobility and dynamic balance of the participant. Participants  
325 will be asked to rise from a standard armchair, walk to a marker 3 meters away, turn,  
326 walk back, and sit down again. This will be completed three times, with the first TUG  
327 will be a practice round(39). For the TUG with cognitive tasks (TUG Cognitive)(38),  
328 participants will be asked to count backwards in sevens from a random start point while  
329 completing the TUG. The performance from the TUG and TUG Cognitive will be  
330 recorded.

331 The following self-reported questionnaires will be collected via an online survey (using  
332 REDCap software) at baseline and after the delivery of the training programme.

333 2. *Decline of cognition and everyday functional abilities.* Everyday Cognition scales short  
334 version (ECog-12; 12 questions in total)(40, 41) will be used to evaluate the decline of  
335 cognition and everyday functional abilities linking to independence in the activities of  
336 daily living. The ECog-12 questionnaire has 12 items on a scale from 1-4, being 1 (better  
337 or no change compared to 10 years ago) and 4 (consistently much worse). The results  
338 from this questionnaire will reflect any effect of the training programme on the cognitive  
339 function affecting daily living which declines with ageing.

340 3. *Self-efficacy in performing daily activities.* Falls Efficacy Scale-International (FES-I),  
341 having 16 items on a scale from 1-4, being 1 (not concerned at all), and 4 (very  
342 concerned), will be used to evaluate the confidence in the performance of activities of  
343 daily living in levels of fall risk (>24 points)(42).

344 4. *Quality of life.* The EQ-5D-5L will be used to assess the quality of life(43). The  
345 questionnaire has 5 items each with five response options, being 1 (no problems) and 5  
346 (unable).

347 5. *Resource Use.* The ModRum questionnaire will be used to evaluate the use of healthcare  
348 services, providing basic health economics information of the intervention(44).

349 6. *Number of falls*. Self-reported number of falls.

350

## 351 **Qualitative Methods**

352 1. *Focus groups*. We will conduct face-to-face semi-structured focus groups with a  
353 purposive sample of 30 participants who have completed the programme to discuss the  
354 content and delivery of the training programme. We will also conduct online semi-  
355 structured focus groups with 30 healthcare professionals including GPs, district nurses,  
356 paramedics, and physiotherapists who are part of the NHS falls prevention care pathways  
357 in the West Midlands, via MS Teams. The healthcare professionals and physiotherapists  
358 involved in the study will be invited to take part in the focus groups to discuss the  
359 feasibility and deliverability of the training programme by the NHS. Discussions will be  
360 downloaded from MS Teams and transcribed verbatim. The focus group recordings will  
361 be coded using Nvivo9 software. Analysis will be deductive, informed by the study  
362 objectives, and will follow a thematic analysis approach. A deliberative approach will be  
363 used to interpret emerging themes with the diverse interdisciplinary author team, and this  
364 serves as a marker of quality (45, 46).

365

## 366 **Statistical analysis**

367 Given the study is a feasibility study, the analysis undertaken will mainly be  
368 descriptive. The feasibility outcome measures will be reported as proportions and percentages  
369 with 95% confidence intervals calculated. Outcome data will be summarised at baseline and  
370 follow-up using appropriate summary statistics. Exploratory analysis may compare the data  
371 form the two assessment time points using a paired t-test (depending on the distribution of the



372 data) to provide preliminary data on the effect of the blended intervention. Analyses will be  
373 undertaken in SPSS(47).

374

## 375 **Data Management**

376 Paper based study records will be kept in locked cabinets within a locked office at the  
377 University of Birmingham. Electronic records will be stored on RedCap which is a secure  
378 data management software application managed by the Birmingham Centre for Observational  
379 and Prospective Studies (BiCOPS) at the University of Birmingham. The recordings from the  
380 focus groups will be held on a secure device and will be uploaded to the University of  
381 Birmingham server. Access to the files will be restricted and password protected.

382

## 383 **Study management and safety**

384 The DT training programme and the behavioural assessments are considered low risk.  
385 The research team will meet monthly to monitor the progress of the study, supervise the  
386 study, and discuss data and adverse events to ensure that the study is conducted in accordance  
387 with the approved protocol and regulations. Three members of the public will be recruited to  
388 the PPIE steering group and meet three times a year. The chief investigator will report the  
389 study progression to the PPIE steering group.

390 The DT programme was designed by experienced physiotherapists and a member of  
391 the public with lived experience to reduce risks and burdens as much as possible. Risks will  
392 be outlined in the PIS and verbally explained to all participants before they provide written  
393 informed consent. Participants will also be verbally reminded after each class on how to  
394 safely undertake the intervention at home.

395

## 396 **Ethics and Dissemination**

397 This study was approved by the Health Research Authority and Health and Care  
398 Research Wales (24/EE/0059). We anticipate that the study will be completed by 31/12/2025  
399 and that results will be disseminated at international conferences and in published peer-  
400 reviewed journals in 2026.

## 401 **Discussion**

402 Falls among older adults are a significant public health concern as they not only result in  
403 physical injuries but can also lead to psychological consequences, such as fear of falling,  
404 which further exacerbates the risk of subsequent falls(48). Given the multifactorial nature of  
405 falls, interventions that target both physical and cognitive function are crucial for fall  
406 prevention in older adults(49). This study seeks to evaluate the feasibility and acceptability of  
407 a technology-based dual tasking exercise training program designed specifically for older  
408 adults at risk of falling.

409 The information in this study will inform the feasibility and design of a larger scale  
410 randomised controlled trial evaluating the clinical and cost-effectiveness of the blended DT  
411 intervention in older adults at risk of falls. The knowledge generated will also have wider  
412 implications on other clinical conditions, where home exercise is a commonly used tool for  
413 maintaining/improving health. This study is especially relevant, given population ageing and  
414 the increased use of technology and mobile apps in older adults during the global pandemics.

415 However, there is limited understanding on how technology can facilitate dual tasking  
416 exercise programs for older adults. Data published by the Office for National Statistics show  
417 that 69% of adults over 65 years and 55% of adults over 75 years owned a smartphone in  
418 2021(50). The number is likely to increase, meaning that it is now the time to evaluate how to  
419 best incorporate these digital tools into standard care and to determine if the quality,

420 outcomes and compliance of technology-based interventions are comparable or superior to  
421 standard care.

422

## 423 **Acknowledgement**

424 We thank Liz Hensel and Tom Tierney from the PPIE steering group for their  
425 contributions in reviewing participant facing documents and feedback on the study design  
426 and management. We also thank Terry Hughes for setting up the RedCap database, which is  
427 critical to the successful management of this study.

428

## 429 **Contributors**

430 Authors' contributions SYC leads the study as the chief contributor. SYC, MC, AS,  
431 VG, CM, NI, LM, PK, and DW obtained the funding for the research. SYC, MC, AS, VG,  
432 CM, NI, LM, PK, DW, PM, AC, HT and TK contributed towards the design of the study. PM  
433 leads the coordination of the study as the trial manager. PM and TK are involved in collection  
434 of data. PM, SYC, NI, and PK are involved in the processing of data. NI will oversee and  
435 support the data and (any) statistical analysis. AS, VG, and PM are responsible for the  
436 qualitative analysis. SYC, CM and PM will manage the budget of the grant. PM and SYC  
437 drafted the manuscript with critical input from all other authors. All authors read and  
438 approved the final draft. All authors have consented to publication.

439

## 440 **References**

- 441 1. Schoene D, Valenzuela T, Lord SR, de Bruin ED. The effect of interactive cognitive-  
442 motor training in reducing fall risk in older people: a systematic review. *BMC Geriatr.*  
443 2014;14:107.
- 444 2. Falls - Overview2021 23-08-2024. Available from:  
445 <https://www.nhs.uk/conditions/falls/#:~:text=Around%20in%203%20adults,not%20res>  
446 [ult%20in%20serious%20injury.](https://www.nhs.uk/conditions/falls/#:~:text=Around%20in%203%20adults,not%20res)
- 447 3. Varela-Vasquez LA, Minobes-Molina E, Jerez-Roig J. Dual-task exercises in older  
448 adults: A structured review of current literature. *J Frailty Sarcopenia Falls.* 2020;5(2):31-7.
- 449 4. Falls: applying All Our Health2022 15/07/2024. Available from:  
450 <https://www.gov.uk/government/publications/falls-applying-all-our-health/falls-applying-all->  
451 [our-health.](https://www.gov.uk/government/publications/falls-applying-all-our-health/falls-applying-all-)
- 452 5. Chantanachai T, Sturnieks DL, Lord SR, Payne N, Webster L, Taylor ME. Risk  
453 factors for falls in older people with cognitive impairment living in the community:  
454 Systematic review and meta-analysis. *Ageing Res Rev.* 2021;71:101452.
- 455 6. Allali G, Launay CP, Blumen HM, Callisaya ML, De Cock AM, Kressig RW, et al.  
456 Falls, Cognitive Impairment, and Gait Performance: Results From the GOOD Initiative. *J Am*  
457 *Med Dir Assoc.* 2017;18(4):335-40.
- 458 7. Karen Z. H. Li, Halina Bruce, Downey R. Cognition and Mobility With Aging.  
459 *Oxford Research Encyclopedia of Psychology.* 2018.
- 460 8. Buchman AS, Boyle PA, Leurgans SE, Barnes LL, Bennett DA. Cognitive Function  
461 Is Associated With the Development of Mobility Impairments in Community-Dwelling  
462 Elders. *The American Journal of Geriatric Psychiatry.* 2011;19(6):571-80.
- 463 9. Demnitz N, Esser P, Dawes H, Valkanova V, Johansen-Berg H, Ebmeier KP, Sexton  
464 C. A systematic review and meta-analysis of cross-sectional studies examining the

- 465 relationship between mobility and cognition in healthy older adults. *Gait Posture*.  
466 2016;50:164-74.
- 467 10. Buchman AS, Boyle PA, Leurgans SE, Barnes LL, Bennett DA. Cognitive function is  
468 associated with the development of mobility impairments in community-dwelling elders. *Am*  
469 *J Geriatr Psychiatry*. 2011;19(6):571-80.
- 470 11. Demnitz N, Hogan DB, Dawes H, Johansen-Berg H, Ebmeier KP, Poulin MJ, Sexton  
471 CE. Cognition and mobility show a global association in middle- and late-adulthood:  
472 Analyses from the Canadian Longitudinal Study on Aging. *Gait Posture*. 2018;64:238-43.
- 473 12. Muir-Hunter SW, Wittwer JE. Dual-task testing to predict falls in community-  
474 dwelling older adults: a systematic review. *Physiotherapy*. 2016;102(1):29-40.
- 475 13. Bayot M, Dujardin K, Dissaux L, Tard C, Defebvre L, Bonnet CT, et al. Can dual-  
476 task paradigms predict Falls better than single task? - A systematic literature review.  
477 *Neurophysiol Clin*. 2020;50(6):401-40.
- 478 14. Wang X, Pi Y, Chen P, Liu Y, Wang R, Chan C. Cognitive motor interference for  
479 preventing falls in older adults: a systematic review and meta-analysis of randomised  
480 controlled trials. *Age Ageing*. 2015;44(2):205-12.
- 481 15. Sullivan AN, Lachman ME. Behavior Change with Fitness Technology in Sedentary  
482 Adults: A Review of the Evidence for Increasing Physical Activity. *Front Public Health*.  
483 2016;4:289.
- 484 16. Callisaya ML, Jayakody O, Vaidya A, Srikanth V, Farrow M, Delbaere K. A novel  
485 cognitive-motor exercise program delivered via a tablet to improve mobility in older people  
486 with cognitive impairment - StandingTall Cognition and Mobility. *Exp Gerontol*.  
487 2021;152:111434.

- 488 17. Papi E, Chiou SY, McGregor AH. Feasibility and acceptability study on the use of a  
489 smartphone application to facilitate balance training in the ageing population. *BMJ Open*.  
490 2020;10(12):e039054.
- 491 18. Valenzuela T, Okubo Y, Woodbury A, Lord SR, Delbaere K. Adherence to  
492 Technology-Based Exercise Programs in Older Adults: A Systematic Review. *J Geriatr Phys*  
493 *Ther*. 2018;41(1):49-61.
- 494 19. Netz Y, Yekutieli Z, Arnon M, Argov E, Tchelet K, Benmoha E, Jacobs JM.  
495 Personalized Exercise Programs Based upon Remote Assessment of Motor Fitness: A Pilot  
496 Study among Healthy People Aged 65 Years and Older. *Gerontology*. 2022;68(4):465-79.
- 497 20. Smith-Ray RL, Makowski-Woidan B, Hughes SL. A randomized trial to measure the  
498 impact of a community-based cognitive training intervention on balance and gait in  
499 cognitively intact Black older adults. *Health Educ Behav*. 2014;41(1 Suppl):62S-9S.
- 500 21. Rasche P, Wille M, Brohl C, Theis S, Schafer K, Knobe M, Mertens A. Prevalence of  
501 Health App Use Among Older Adults in Germany: National Survey. *JMIR Mhealth Uhealth*.  
502 2018;6(1):e26.
- 503 22. McGarrigle L, Boulton E, Todd C. Map the apps: a rapid review of digital approaches  
504 to support the engagement of older adults in strength and balance exercises. *BMC Geriatr*.  
505 2020;20(1):483.
- 506 23. Wilson J, Heinsch M, Betts D, Booth D, Kay-Lambkin F. Barriers and facilitators to  
507 the use of e-health by older adults: a scoping review. *BMC Public Health*. 2021;21(1):1556.
- 508 24. Hughes KJ, Salmon N, Galvin R, Casey B, Clifford AM. Interventions to improve  
509 adherence to exercise therapy for falls prevention in community-dwelling older adults:  
510 systematic review and meta-analysis. *Age Ageing*. 2019;48(2):185-95.
- 511 25. Wang RY, Huang YC, Zhou JH, Cheng SJ, Yang YR. Effects of Exergame-Based  
512 Dual-Task Training on Executive Function and Dual-Task Performance in Community-

- 513 Dwelling Older People: A Randomized-Controlled Trial. *Games Health J.* 2021;10(5):347-  
514 54.
- 515 26. PEAK-Brain Training App. <https://www.peak.net/science/>.  
516 27. Ltd. SL. Peak (Version 5.34.9) [Mobile application software]. 2024.
- 517 28. Sim J, Lewis M. The size of a pilot study for a clinical trial should be calculated in  
518 relation to considerations of precision and efficiency. *J Clin Epidemiol.* 2012;65(3):301-8.
- 519 29. Teare MD, Dimairo M, Shephard N, Hayman A, Whitehead A, Walters SJ. Sample  
520 size requirements to estimate key design parameters from external pilot randomised  
521 controlled trials: a simulation study. *Trials.* 2014;15:264.
- 522 30. Lancaster GA, Dodd S, Williamson PR. Design and analysis of pilot studies:  
523 recommendations for good practice. *J Eval Clin Pract.* 2004;10(2):307-12.
- 524 31. Alexander NB, Hausdorff JM. Guest editorial: linking thinking, walking, and falling.  
525 *J Gerontol A Biol Sci Med Sci.* 2008;63(12):1325-8.
- 526 32. Liu Y, Chan JS, Yan JH. Neuropsychological mechanisms of falls in older adults.  
527 *Front Aging Neurosci.* 2014;6:64.
- 528 33. Clouston SA, Brewster P, Kuh D, Richards M, Cooper R, Hardy R, et al. The  
529 dynamic relationship between physical function and cognition in longitudinal aging cohorts.  
530 *Epidemiol Rev.* 2013;35(1):33-50.
- 531 34. Divandari N, Bird ML, Vakili M, Jaberzadeh S. The Association Between Cognitive  
532 Domains and Postural Balance among Healthy Older Adults: A Systematic Review of  
533 Literature and Meta-Analysis. *Curr Neurol Neurosci Rep.* 2023;23(11):681-93.
- 534 35. Hawley-Hague H, Horne M, Campbell M, Demack S, Skelton DA, Todd C. Multiple  
535 levels of influence on older adults' attendance and adherence to community exercise classes.  
536 *Gerontologist.* 2014;54(4):599-610.

- 537 36. Lucidi F, Grano C, Barbaranelli C, Violani C. Social-cognitive determinants of  
538 physical activity attendance in older adults. *J Aging Phys Act.* 2006;14(3):344-59.
- 539 37. Avan BI, Berhanu D, Umar N, Wickremasinghe D, Schellenberg J. District decision-  
540 making for health in low-income settings: a feasibility study of a data-informed platform for  
541 health in India, Nigeria and Ethiopia. *Health Policy Plan.* 2016;31 Suppl 2(Suppl 2):ii3-ii11.
- 542 38. Shumway-Cook A, Brauer S, Woollacott M. Predicting the probability for falls in  
543 community-dwelling older adults using the Timed Up & Go Test. *Physical Therapy.*  
544 2000;80(9):896-903.
- 545 39. Zasadzka E, Borowicz AM, Roszak M, Pawlaczyk M. Assessment of the risk of  
546 falling with the use of timed up and go test in the elderly with lower extremity osteoarthritis.  
547 *Clin Interv Aging.* 2015;10:1289-98.
- 548 40. Tomaszewski Farias S, Mungas D, Harvey DJ, Simmons A, Reed BR, Decarli C. The  
549 measurement of everyday cognition: development and validation of a short form of the  
550 Everyday Cognition scales. *Alzheimers Dement.* 2011;7(6):593-601.
- 551 41. Farias ST, Weakley A, Harvey D, Chandler J, Huss O, Mungas D. The Measurement  
552 of Everyday Cognition (ECog): Revisions and Updates. *Alzheimer Dis Assoc Disord.*  
553 2021;35(3):258-64.
- 554 42. Delbaere K, Close JC, Mikolaizak AS, Sachdev PS, Brodaty H, Lord SR. The Falls  
555 Efficacy Scale International (FES-I). A comprehensive longitudinal validation study. *Age*  
556 *Ageing.* 2010;39(2):210-6.
- 557 43. Herdman M, Gudex C, Lloyd A, Janssen M, Kind P, Parkin D, et al. Development  
558 and preliminary testing of the new five-level version of EQ-5D (EQ-5D-5L). *Qual Life Res.*  
559 2011;20(10):1727-36.



- 560 44. Garfield K, Thorn JC, Noble S, Husbands S, Hollingworth W. Development of a  
561 brief, generic, modular resource-use measure (ModRUM): piloting with patients. BMC  
562 Health Serv Res. 2023;23(1):994.
- 563 45. Goodyear VA, Boardley I, Chiou SY, Fenton SAM, Makopoulou K, Stathi A, et al.  
564 Social media use informing behaviours related to physical activity, diet and quality of life  
565 during COVID-19: a mixed methods study. BMC Public Health. 2021;21(1):1333.
- 566 46. Stathi A, Greaves CJ, Thompson JL, Withall J, Ladlow P, Taylor G, et al. Effect of a  
567 physical activity and behaviour maintenance programme on functional mobility decline in  
568 older adults: the REACT (Retirement in Action) randomised controlled trial. Lancet Public  
569 Health. 2022;7(4):e316-e26.
- 570 47. IBM SPSS Statistics for Windows. 29.0.2.0 ed. Armonk, NY: IBM Corp2023.
- 571 48. Tinetti ME, Baker DI, McAvay G, Claus EB, Garrett P, Gottschalk M, et al. A  
572 multifactorial intervention to reduce the risk of falling among elderly people living in the  
573 community. N Engl J Med. 1994;331(13):821-7.
- 574 49. Anne Shumway-Cook MW. Translating research into clinical practice. Abstracts of  
575 the Seventh International Symposium on Osteoporosis. April 18-22, 2007. Washington, DC,  
576 USA. Osteoporos Int. 2007;18 Suppl 2:S193-244.
- 577 50. Percentage of homes and individuals with technological equipment2022 19/08/2024.  
578 Available from:  
579 [https://www.beta.ons.gov.uk/aboutus/transparencyandgovernance/freedomofinformationfoi/p](https://www.beta.ons.gov.uk/aboutus/transparencyandgovernance/freedomofinformationfoi/percentageofhomesandindividualswithtechnologicalequipment)  
580 [ercentageofhomesandindividualswithtechnologicalequipment](https://www.beta.ons.gov.uk/aboutus/transparencyandgovernance/freedomofinformationfoi/percentageofhomesandindividualswithtechnologicalequipment).

581

582

583 **Figure legends**

584 **Fig 1. Schedule of enrolment, interventions and assessment.** Preparation ( $t_{-1}$ ), baseline ( $t_0$ ),  
585 week 12 ( $t_1$ ), week 24( $t_2$ ). Everyday Cognition (ECog) 12-item scale; Falls Efficacy Scale –  
586 International (FES-I); EuroQol 5 Dimension-5 Levels (EQ-5D-5L); Modular resource-use  
587 measure (ModRUM).

588 **Fig 2. Study Flow Diagram.** DT: dual-task; TUG: Timed Up & Go.

589

590 **Supporting information**

591 **S1. Appendix. SPIRIT Checklist 2013**

592 **S2 Appendix. Consent Form**

593 **S3 Appendix. Exercise Handbook**

594 **S4 Appendix. Peak app Handbook**

595 **S5 Appendix. Exit questionnaire**

**Figure 2. Study Flow Diagram**

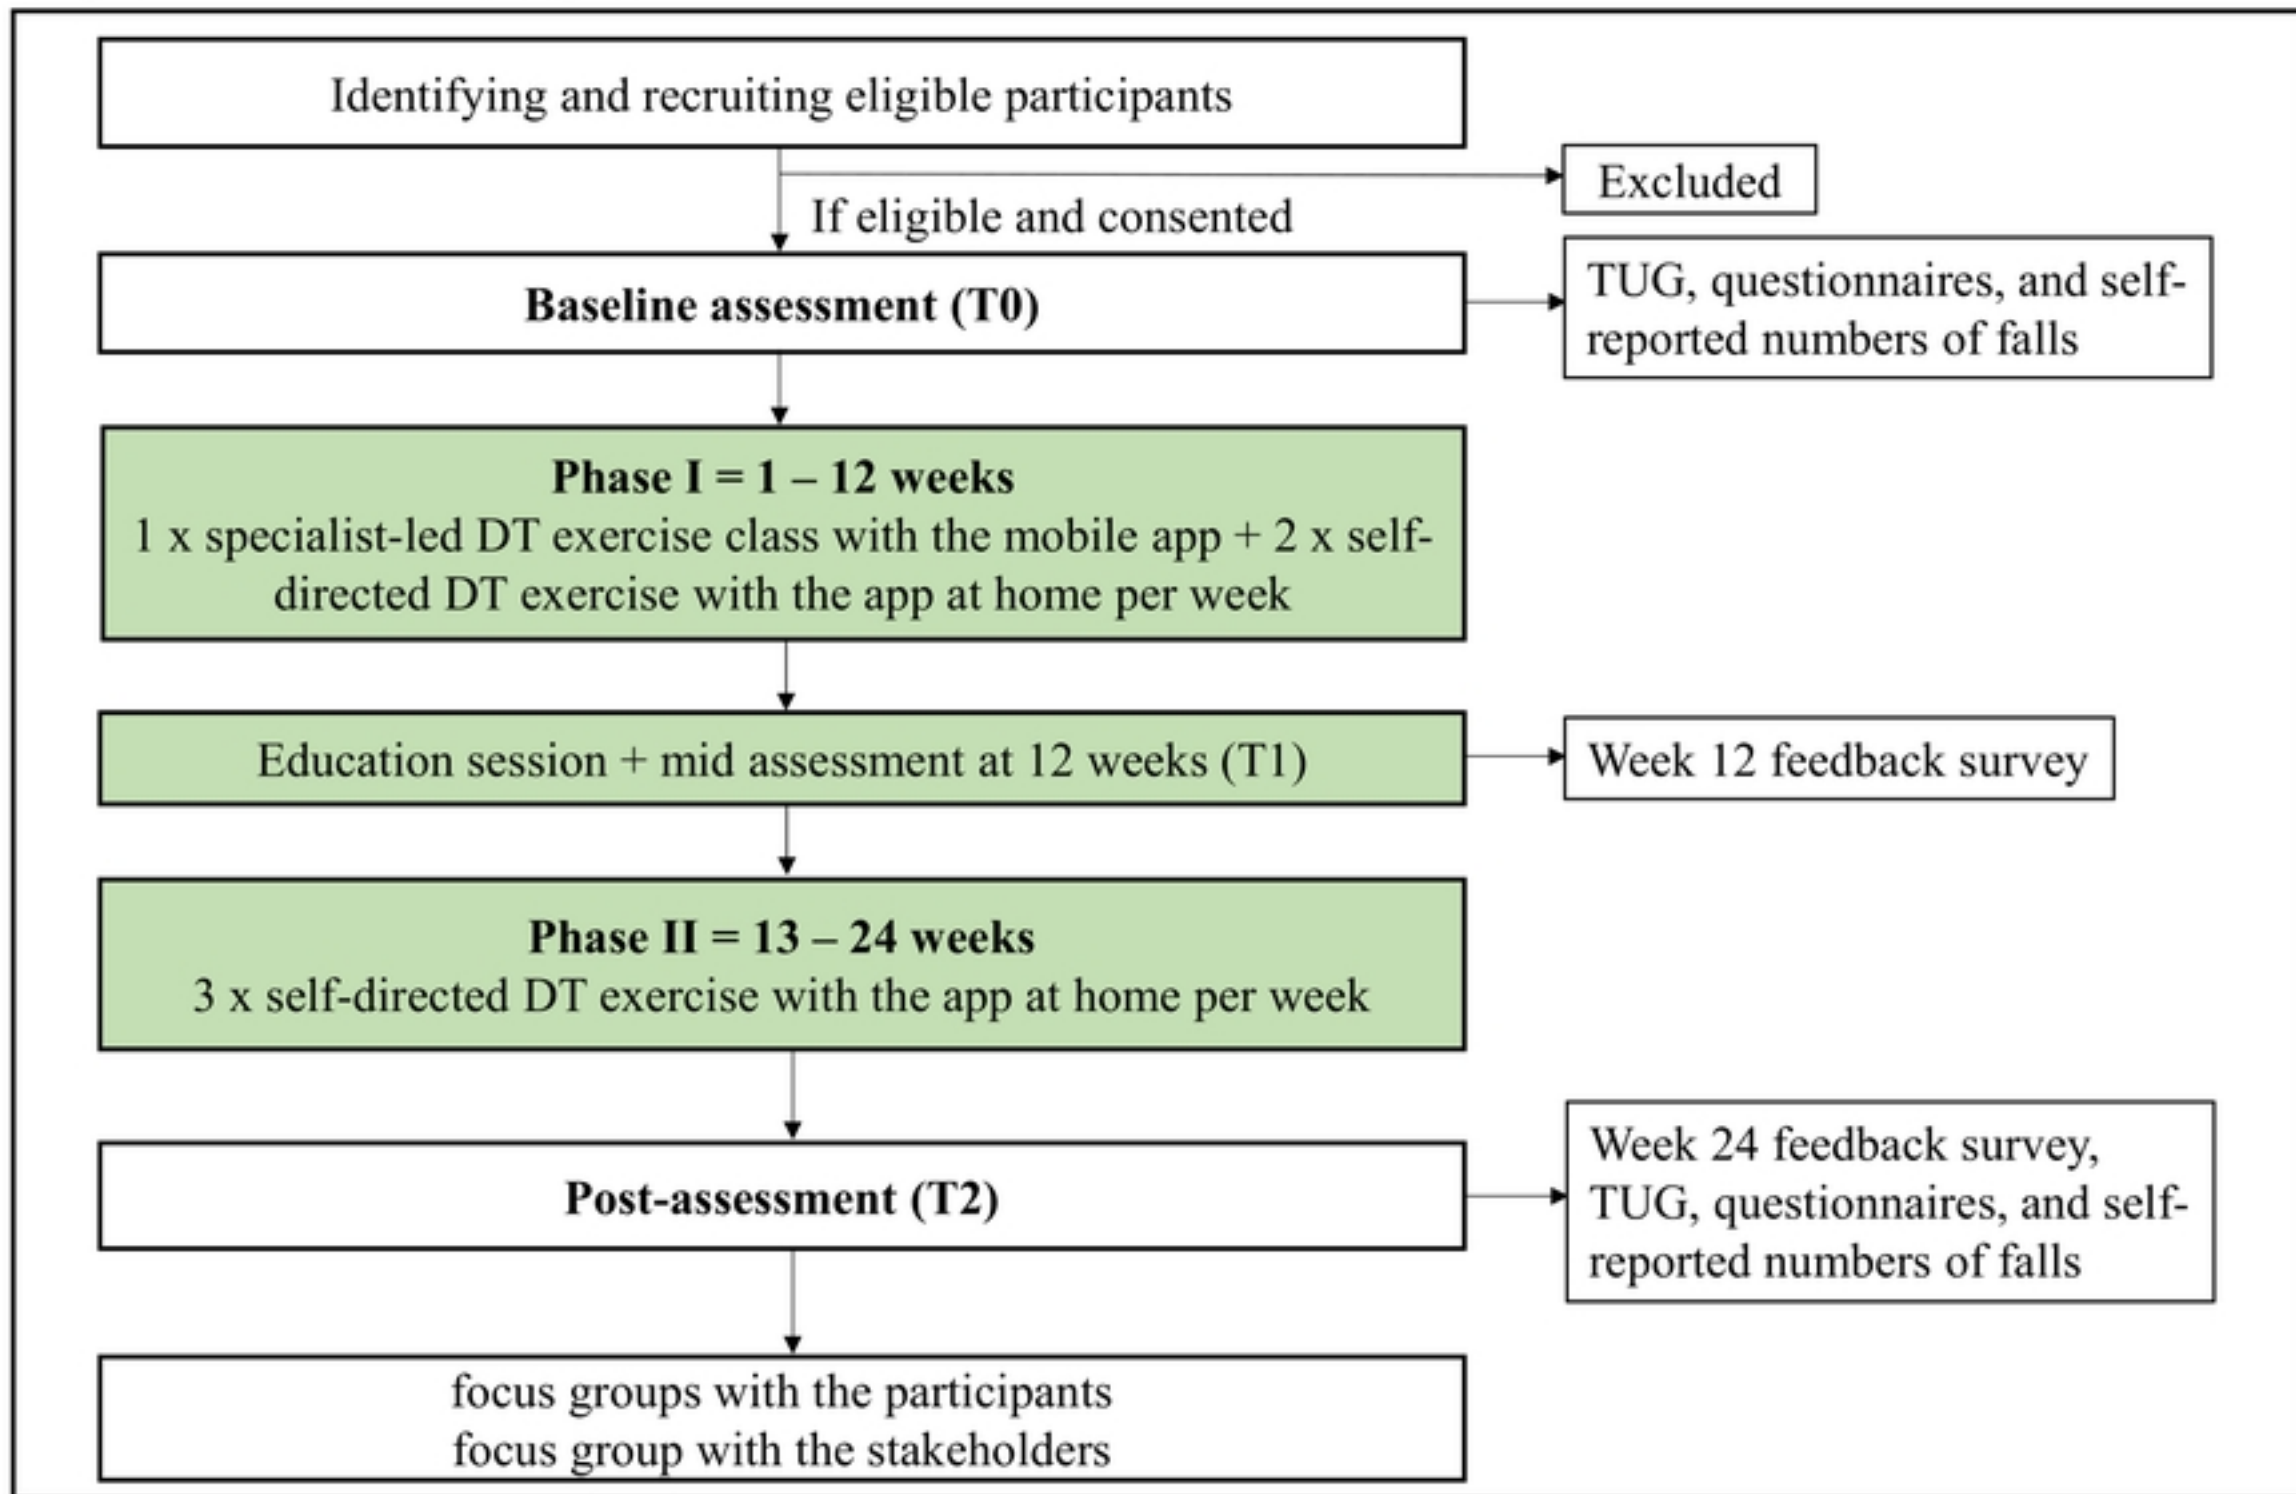

Figure 2

Figure 1. schedule of enrolment, interventions and assessment

|                                                                        |         | Study Period                  |                |                |                |
|------------------------------------------------------------------------|---------|-------------------------------|----------------|----------------|----------------|
| Timepoints                                                             |         | t <sub>-1</sub>               | t <sub>0</sub> | t <sub>1</sub> | t <sub>2</sub> |
| <b>Enrolment:</b>                                                      |         |                               |                |                |                |
| Eligibility screen                                                     |         | X                             |                |                |                |
| Informed consent                                                       |         | X                             |                |                |                |
| <b>Intervention:</b>                                                   |         |                               |                |                |                |
| Setting up Peak app                                                    |         | X                             |                |                |                |
| DT training program                                                    | Phase 1 |                               | ←→             |                |                |
|                                                                        | Phase 2 |                               |                | ←→             |                |
| <b>Assessments:</b>                                                    |         |                               |                |                |                |
| Demographics and self-reported number of falls                         |         |                               | X              |                |                |
| <ul style="list-style-type: none"> <li>Feasibility Outcomes</li> </ul> |         |                               |                |                |                |
| Recruitment                                                            |         | X                             |                |                |                |
| Adherence                                                              |         |                               | X              | X              | X              |
| App usage                                                              |         |                               | X              | X              | X              |
| Attrition                                                              |         |                               | X              | X              | X              |
| Feedback from participants                                             |         | Exit questionnaire            |                | X              | X              |
| <ul style="list-style-type: none"> <li>Exploratory Outcomes</li> </ul> |         |                               |                |                |                |
| Mobility and dynamic balance                                           |         | Time Up and Go test           |                | X              | X              |
| Everyday functioning                                                   |         | ECog-12                       |                | X              | X              |
| Fear of falling                                                        |         | FES-I                         |                | X              | X              |
| Quality of Life                                                        |         | EQ-5D-5L                      |                | X              | X              |
| Resource Use                                                           |         | ModRum                        |                | X              | X              |
| Number of falls                                                        |         | Self-reported number of falls |                | X              | X              |
| Acceptability, feasibility and NHS implementation                      |         | Focus group                   |                |                | X              |

medRxiv preprint doi: <https://doi.org/10.1101/2024.11.19.24317600>; this version posted November 20, 2024. The copyright holder for this preprint (which was not certified by peer review) is the author/funder, who has granted medRxiv a license to display the preprint in perpetuity. It is made available under a [CC-BY 4.0 International license](https://creativecommons.org/licenses/by/4.0/).

Abbreviation: Preparation (t<sub>-1</sub>), baseline (t<sub>0</sub>), week 12 (t<sub>1</sub>), week 24(t<sub>2</sub>). Everyday Cognition (ECog) 12-item scale; Falls Efficacy Scale – International (FES-I); EuroQol 5 Dimension-5 Levels (EQ-5D-5L); Modular resource-use measure (ModRUM).
